# Supplementary material
Source: PubMed Central journal article supplement (PMC3128771)
Supplement: Supp_Data.pdf [file Supp_Data.pdf]

## Supplementary Data

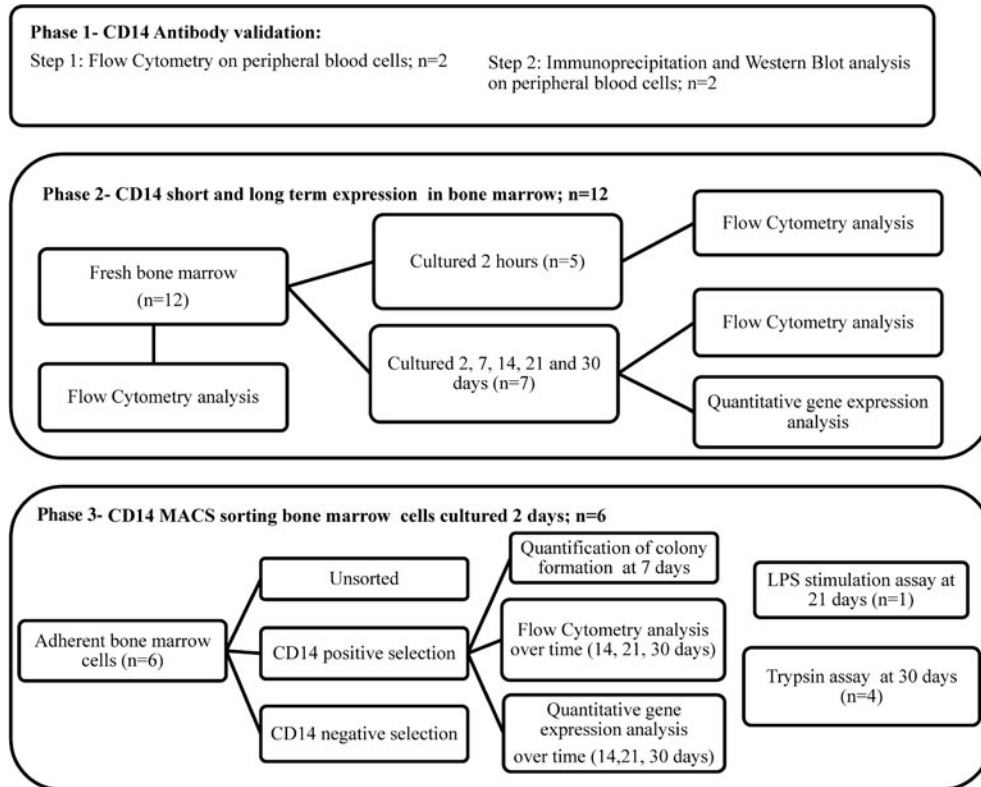

**SUPPLEMENTARY FIG. S1.** Study design overview. The study was conducted in 3 phases. Phase 1 consisted of antibody validation. During Phase 2, the expression of CD14 in bone marrow cells was evaluated. Phase 3 tested the utility of CD14 as a cell sorting marker.
